# Supplementary material for: Interpretable machine-learning-derived diagnostic scoring panel for endometriosis identification: a study of serum amino acid profiling
Source: Research Square preprint supplement (doi:10.21203/rs.3.rs-6696073/v1), 2025-07-29
Supplement: Supplementary file 1 [file a8dfb63cbbc6f6312f16c9c5.docx]

**Table S1. The detailed demographic and clinical characteristics of all subjects**

| **Features** | | **NC (N=137)** | **EM (N=167)** | ***P* value** |
| --- | --- | --- | --- | --- |
| **Age** | | 35.06 ± 7.88 | 33.71 ± 6.80 | 0.111 |
| **Dysmenorrhea** | No | 125 | 75 | < 0.001 |
| Yes | 12 | 93 |
| **PBMC** | | 0.35 ± 0.12 | 0.31 ± 0.11 | 0.004 |
| **CHOL (mmol/L)** | | 4.87 ± 0.97 | 4.70 ± 0.81 | 0.090 |
| **TG (mmol/L)** | | 1.06 ± 0.77 | 0.86 ± 0.48 | 0.007 |
| **ALT (U/L)** | | 20.33 ± 17.30 | 16.66 ± 9.77 | 0.021 |
| **AST (U/L)** | | 20.53 ± 6.73 | 18.63 ± 4.94 | 0.005 |
| **GGT (U/L)** | | 21.17 ± 14.08 | 18.56 ± 11.29 | 0.074 |
| **HDL-C (mmol/L)** | | 1.71 ± 0.41 | 1.74 ± 0.47 | 0.547 |
| **AFP (ng/mL)** | | 6.04 ± 27.64 | 2.76 ± 1.17 | 0.127 |
| **CEA (ng/mL)** | | 0.99 ± 0.62 | 1.14 ± 0.59 | 0.035 |
| **CA125 (U/mL)** | Normal (<35) | 126 | 70 | < 0.001 |
| High (≥35) | 11 | 97 |
| **CA199 (U/mL)** | | 11.00 ± 7.55 | 34.84 ± 37.67 | < 0.001 |
| **ASRM Stages** | Ⅲ (Scores) | / | 82 (25.47 ± 7.62) | / |
| Ⅳ (Scores) | / | 85 (84.62 ± 17.15) | / |
| **Diameter (mm)** | | / | 69.14 ± 21.15 | / |
| **Lesion number** | Single | / | 106 (OvE = 84,  Adenomyosis = 22) | / |
| Multiple | / | 61 (OvE = 48,  OvE and adenomyosis = 13) | / |

PBMC, peripheral blood mononuclear cell; CHOL, cholesterol; TG, triglycerides; ALT, alanine aminotransferase; AST, aspartate aminotransferase; GGT, γ-glutamyl transpeptidase; HDL-C, high-density lipoprotein cholesterol; AFP, alpha-fetoprotein; CEA, carcinoembryonic antigen ; CA 125, cancer antigen 125; CA 199, cancer antigen; ASRM, The American Society for Reproductive Medicine; OvE, ovarian endometriosis
