# Supplementary material for: Interpretable machine-learning-derived diagnostic scoring panel for endometriosis identification: a study of serum amino acid profiling
Source: Research Square preprint supplement (doi:10.21203/rs.3.rs-6696073/v1), 2025-07-29
Supplement: Supplementary file 2 [file f3d61f31526534054a353e27.docx]

**Table S2. The regression equation, r2 and linear range for 33 amino acids.**

| **Amino acid** | **Regression equation** | **r²** | **Linear range (μmol/L)** |
| --- | --- | --- | --- |
| 3-MeHis | y = 0.0584 x - 0.4537 | 0.9926 | 1 - 200 |
| Ala | y = 0.0051 x - 0.1445 | 0.9932 | 5 - 1000 |
| Arg | y = 0.0103 x - 0.0858 | 0.9939 | 20 - 1000 |
| Asn | y = 0.0011 x - 0.0009 | 0.9992 | 1 - 250 |
| Asp | y = 0.0024 x - 0.0235 | 0.9945 | 2.5 - 500 |
| Cys | y = 0.0148 x - 0.2307 | 0.9942 | 5 - 500 |
| Dmg | y = 0.0323 x + 0.1074 | 0.9980 | 1 - 250 |
| GABA | y = 0.0049 x - 0.0768 | 0.9954 | 1 - 1000 |
| Gln | y = 0.0308 x - 1.1577 | 0.9981 | 10 - 2000 |
| Glu | y = 0.0050 x - 0.0241 | 0.9985 | 5 - 1000 |
| Gly | y = 0.0001 x - 0.0001 | 0.9938 | 10 - 2000 |
| Gua | y = 0.0071 x + 0.1462 | 0.9954 | 1 - 1000 |
| HCit | y = 0.0565 x - 0.2168 | 0.9954 | 1 - 200 |
| His | y = 0.0173 x - 0.1883 | 0.9987 | 5 - 1000 |
| H-Lys(Ac)-OH | y = 0.0544 x + 0.0727 | 0.9979 | 1 - 250 |
| Hyp | y = 0.1003 x - 0.0315 | 0.9989 | 0.5 - 50 |
| Ile | y = 0.1183 x - 1.9826 | 0.9985 | 5 - 1000 |
| Kyn | y = 0.0430 x - 0.2077 | 0.9933 | 1 - 200 |
| Leu | y = 0.0104 x - 0.0669 | 0.9998 | 5 - 1000 |
| Lys | y = 0.0336 x - 0.9825 | 0.9968 | 5 - 1000 |
| Met | y = 0.0085 x - 0.0140 | 0.9998 | 4 - 400 |
| Orn | y = 0.0713 x - 0.4579 | 0.9995 | 5 - 1000 |
| PGA | y = 0.0026 x - 0.0261 | 0.9958 | 5 - 1000 |
| Phe | y = 0.0779 x - 0.8029 | 0.9954 | 2.5 - 500 |
| Pip | y = 0.1652 x + 0.2755 | 0.9948 | 0.1 - 250 |
| Pro | y = 0.0503 x - 0.2942 | 0.9986 | 2.5 - 500 |
| SAH | y = 0.0374 x - 0.0246 | 0.9953 | 0.5 - 50 |
| Ser | y = 0.0019 x - 0.0053 | 0.9858 | 5 - 1000 |
| SMC | y = 0.0297 x - 0.0145 | 0.9982 | 0.5 - 50 |
| The | y = 0.1362 x - 2.3098 | 0.9934 | 1 - 1000 |
| Thr | y = 0.0142 x - 0.2819 | 0.9957 | 5 - 1000 |
| Trp | y = 0.0417 x + 0.6497 | 0.9988 | 5 - 1000 |
| Tyr | y = 0.0015 x - 0.0371 | 0.9957 | 10 - 1000 |

3-MeHis, 3-methyl-L-histidine; Ala, alanine; Arg, arginine; Asn, asparagine; Asp, aspartic acid; Cys, cystine; Dmg, N,N-dimethylglycine; GABA, γ-aminobutyric acid; Glu, glutamic acid; Gln, glutamine; Gly, glycine; Gua, guanidinoacetic acid; HCit, homocitrulline; His, histidine; H-Lys(Ac)-OH, N6-acetyl-L-lysine; Hyp, hydroxyproline; Ile, isoleucine; Kyn, kynurenine; Leu, leucine; Lys, lysine; Met, methionine; Orn, ornithine; PGA, pyroglutamic acid; Phe, phenylalanine; Pip, pipecolic acid; Pro, proline; SAH, S-adenosyl-L-homocysteine; Ser, serine; SMC, S-methyl-L-cysteine; The, theanine; Thr, threonine; Trp, tryptophan; Tyr, tyrosine.
